# Supplementary material
Source: PubMed Central journal article supplement (PMC6686705)
Supplement: Supp_Fig1.pdf [file Supp_Fig1.pdf]

## SUPPLEMENTAL DATA

### **Bioreactor System to Perfuse Mesentery Microvascular Networks and Study Flow Effects During Angiogenesis**

Jessica M. Motherwell, BS<sup>1,2</sup>, Maximillian Rozenblum<sup>2</sup>, Prasad V.G. Katakam, MD, PhD<sup>3</sup>, Walter L. Murfee, PhD<sup>2\*</sup>

<sup>1</sup> Department of Biomedical Engineering, Tulane University, New Orleans, Louisiana

<sup>2</sup> J. Crayton Pruitt Department of Biomedical Engineering, University of Florida, Gainesville, Florida

<sup>3</sup> Department of Pharmacology, Tulane University School of Medicine, New Orleans, Louisiana

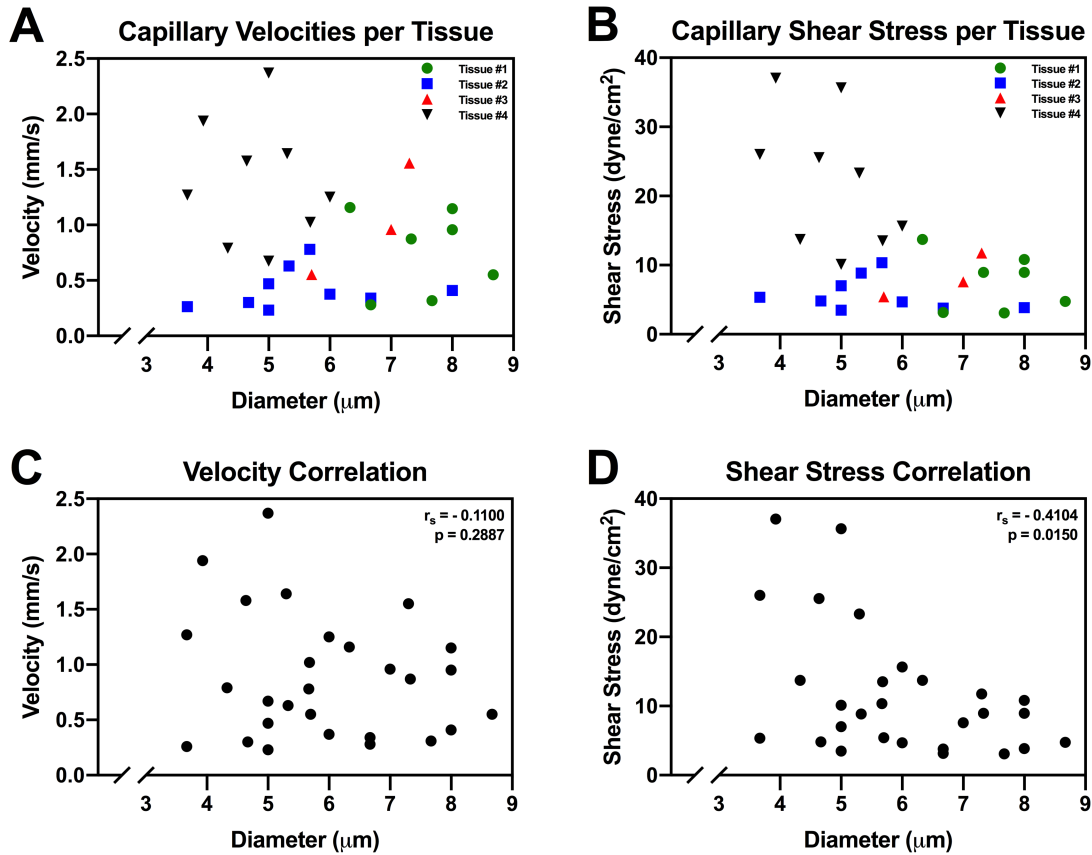

**SUPPLEMENTAL FIG. 1.** Assessment of the relationship between capillary diameter to velocity and shear stress. Scatter plots depicting tissue-specific velocity measurements (**A**) and calculated shear stresses (**B**) per capillary analyzed. The range of velocities and shear stresses is likely attributed to structural differences of each tissue's respective microvascular networks. (**C**, **D**) Spearman correlation analysis of velocity and shear stress compared to capillary diameter per tissue. The " $r_s$ " indicates the Spearman rank order correlation coefficient.
