# Supplementary material
Source: PubMed Central journal article supplement (PMC6686705)
Supplement: Supp_Fig2.pdf [file Supp_Fig2.pdf]

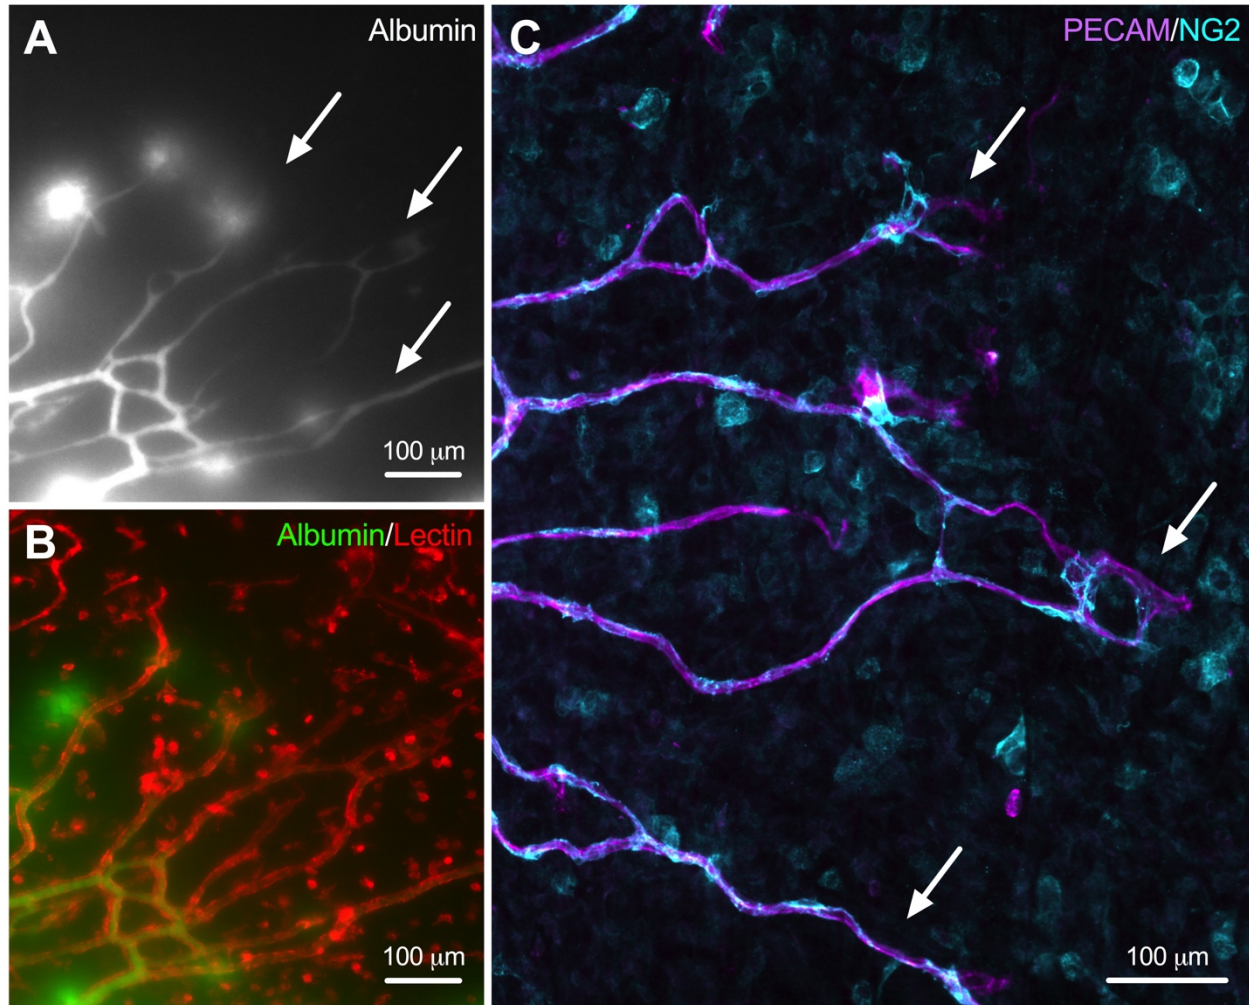

**SUPPLEMENTAL FIG. 2.** Representative immunofluorescence images of NG2-positive pericytes wrapping along capillaries after 48 hours in perfusion culture. Albumin (**A**) and Lectin (**B**) labeling identified perfused capillaries and sprouts in cultured microvascular networks. (**C**) Additional immunolabeling identified pericytes (NG2) along perfused capillaries and sprouts (PECAM). Arrows indicate the same perfused capillaries and sprouts in both (A) and (C) images.
