# Supplementary material
Source: PubMed Central journal article supplement (PMC6686705)
Supplement: Supp_Fig4.pdf [file Supp_Fig4.pdf]

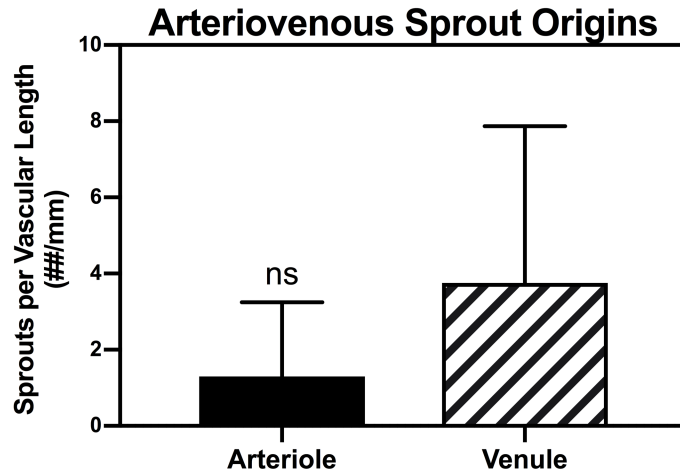

**SUPPLEMENTAL FIG. 4.** Evaluation of the arteriovenous origins of capillary sprouts in tissues cultured with perfusion for 48 hours. Sprouts originating from arterioles and venules were quantified along vascular length. The mean number of sprouts along arteriole length ( $n = 9$  arterioles from 9 microvascular networks) and venule length ( $n = 9$  venules from 9 microvascular networks) was  $1.3 \pm 0.7$  sprouts/arteriole length and  $3.8 \pm 1.4$  sprouts/venule length, respectively. Sprouts originating from arterioles were not significantly different ( $p = 0.1252$ ) than sprouts originating from venules. Black and striped bars represent Arteriole Sprouts and Venule Sprouts, respectively. The “ns” no significant difference ( $p > 0.05$ ).
