# Supplementary material
Source: PubMed Central journal article supplement (PMC6686705)
Supplement: Supp_Table1.pdf [file Supp_Table1.pdf]

Supplemental Table 1. Velocity Measurements per Vessel Type

|           | Vessel Type | n | Diameter ( $\mu\text{m}$ ) |         | Velocity (mm/s) |             | Shear Stress ( $\text{dyne/cm}^2$ ) |            |
|-----------|-------------|---|----------------------------|---------|-----------------|-------------|-------------------------------------|------------|
|           |             |   | Mean $\pm$ SD              | Range   | Mean $\pm$ SD   | Range       | Mean $\pm$ SD                       | Range      |
| Tissue #1 | Venule      | 3 | 28 $\pm$ 7.6               | 22 – 37 | 0.54 $\pm$ 0.09 | 0.44 – 0.62 | 1.1 $\pm$ 0.25                      | 0.93 – 1.4 |
|           | Arteriole   | 4 | 19 $\pm$ 7.2               | 11 – 27 | 1.0 $\pm$ 0.25  | 0.84 – 1.4  | 3.3 $\pm$ 1.3                       | 1.7 – 4.8  |
| Tissue #2 | Venule      | 8 | 14 $\pm$ 3.2               | 11 – 20 | 0.43 $\pm$ 0.14 | 0.30 – 0.71 | 1.8 $\pm$ 0.83                      | 1.0 – 3.6  |
|           | Arteriole   | 3 | 12 $\pm$ 1.9               | 10 – 14 | 0.56 $\pm$ 0.26 | 0.27 – 0.78 | 2.6 $\pm$ 1.2                       | 1.5 – 3.8  |
| Tissue #3 | Venule      | 8 | 25 $\pm$ 9.2               | 12 – 37 | 0.67 $\pm$ 0.28 | 0.23 – 0.98 | 1.8 $\pm$ 1.2                       | 0.71 – 4.4 |
|           | Arteriole   | 3 | 16 $\pm$ 4.2               | 12 – 20 | 1.4 $\pm$ 0.42  | 0.96 – 1.7  | 4.9 $\pm$ 0.40                      | 4.6 – 5.3  |

**SUPPLEMENTAL TABLE 1.** Measured velocities and calculated wall shear stresses from a subset of arterioles and venules that were downstream of the main feeding arteriole and draining venule for three mesentery tissues. Arteriole and venule identity were confirmed based on flow directionality at vessel branch points.
